## RESEARCH ARTICLE

# Interactive effect of oral anti-hyperglycaemic or anti-hypertensive drugs on the inhibitory and bactericidal activity of first line anti-TB drugs against *M. tuberculosis*

Priyanka Trivedi, Vinita Chaturvedi \*

Biochemistry and Structural Biology Division, Central Drug Research Institute, Lucknow, UP, India

\* [vinita\\_chaturvedi@cdri.res.in](mailto:vinita_chaturvedi@cdri.res.in)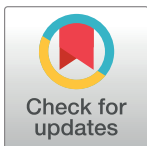

## Abstract

Co-existence of life style disorders, like, Diabetes or Hypertension, increases risk of, treatment failure, deaths and developing drug-resistant TB. Concomitant administration of drugs to treat dual/multi-morbidities may alter their effectiveness, in additive/synergistic or adverse/antagonistic manner. We evaluated interactive effect of 7 anti-hyperglycaemic (HG) and 6 anti-hypertensive (HT) drugs on the inhibitory (MICs) and bactericidal (% killing of intracellular bacilli) activities of anti-TB drugs, Isoniazid (INH), Rifampicin (RFM), Ethambutol (EMB) and Streptomycin (STR) against *M. tuberculosis*. Five anti-HG drugs, namely, Acarbose, Acetohexamide, Glyburide, Repaglinide and Sitagliptin imparted either 'additive' or 'no effect' on the activities (inhibition or % killing) of all the four anti-TB drugs, as evident by their lower FICs (Fractional Inhibitory concentrations) and higher bacterial killing in combination. Metformin and Rosiglitazone, however, exerted adverse effect on the Ethambutol (FICs >2.0). All the six anti-HT drugs, namely, Atenolol, Hydrochlorothiazide, Ramipril, Valsartan, Nifedipine and Verapamil exerted either 'additive'/'synergistic' or 'no effect' on the activities of anti-TB drugs. These findings may help clinicians to select safe and helpful anti-HG or anti-HT drugs for TB patients, if, suffering with diabetes or hypertension like co-morbidities and receiving DOTs (a set regimen for the treatment of TB based on the WHO guidelines).

## OPEN ACCESS

**Citation:** Trivedi P, Chaturvedi V (2023) Interactive effect of oral anti-hyperglycaemic or anti-hypertensive drugs on the inhibitory and bactericidal activity of first line anti-TB drugs against *M. tuberculosis*. PLoS ONE 18(11): e0292397. <https://doi.org/10.1371/journal.pone.0292397>

**Editor:** Vinayak Singh, University of Cape Town, SOUTH AFRICA

**Received:** May 31, 2023

**Accepted:** September 19, 2023

**Published:** November 30, 2023

**Copyright:** © 2023 Trivedi, Chaturvedi. This is an open access article distributed under the terms of the [Creative Commons Attribution License](https://creativecommons.org/licenses/by/4.0/), which permits unrestricted use, distribution, and reproduction in any medium, provided the original author and source are credited.

**Data Availability Statement:** All relevant data are within the paper and its [Supporting Information](#) files.

**Funding:** The author(s) received no specific funding for this work.

**Competing interests:** The authors have declared that no competing interests exist.

## Introduction

Globally recent past (between 2000 and 2017) witnessed a 42% decline in deaths and 1.5% annual fall in the incidence rate of Tuberculosis (TB). In spite of these figures, TB continues to be a major health threat worldwide. Estimation of TB incidence during the COVID-19 pandemic is much more difficult than previously. In an estimated global total, 10.6 million people fell ill with TB in 2021 with an estimated 1.6 million deaths. This was up from best estimates of 1.5 million in 2020 and 1.4 million, deaths in 2019 [1]. The disease can affect anyone or everyone, but there are specific population groups who are at higher risk of acquiring TB infection

and progressing to disease once infected. These risk factors can be divided into two groups, first socio-economic, e.g., people living in, Congregate settings (prisons), endemic areas having high risk of transmission of *M. tuberculosis*, Poverty (Malnutrition, Homelessness), Alcoholism, tobacco smoking and drug abuse, etc. The second group includes medical co-morbidities, i.e., HIV co-infection, non-communicable diseases (NCDs) [2] such as Diabetes mellitus (DM) [3, 4], cardiovascular diseases (CVDs) [5], lung cancer and chronic respiratory diseases [2, 5]. Reports indicate, that, risk of developing TB gets many folds higher with these risk factors, e.g. DM, Tobacco smoking and alcoholism, individually, increases risk by 2-3-fold, HIV-Co-infection increases the risk by 15-20-fold.

In the scenario of dual co-morbidity of TB and DM, one disease automatically clubbed in, is Hypertension. Because, occurrence of Hypertension is very common in diabetic patients and this combination contributes immensely to increase the risk of cardiovascular disease. According to the IDF Diabetes Atlas 2021 reports 10.5% of the adult population of age range 20–79 years has diabetes and by the year 2045, approximately 783 million, will be living with diabetes with an increase of 46% [6]. According to WHO report (2023), worldwide, about 422 million people have diabetes and 1.5 million deaths directly attributed to diabetes each year [7]. LMICs (Low- and Middle- Income Countries) are particularly expected to suffer with highest increases mainly in type 2 diabetes [2]

Worldwide, many studies showed concomitant diabetes mellitus in about 5–30% of TB patients [8–11]. The relative risk for TB among diabetic patients has been reported is 3.11-fold higher for Drug susceptible TB [12], whereas, 2.1-fold higher in multidrug-resistant (MDR) TB [13]. Reports showed a bidirectional relationship between TB and diabetes, and both affects the presentation of each other, negatively [14]. On one side, diabetes increases the risk for developing more severe forms of TB and also affects its presentation, e.g., probability of reactivation has been found higher in patients with DM (as compared to non-diabetics), as evident by the relatively higher involvement of lower lobes of Lungs in the former [15]. Further, rates of haemoptysis, fever, and atypical presentations are also found higher in patients with dual morbidity as compared to non-diabetics with TB [16, 17]. Diabetes is associated with increased risk of, developing active TB, deaths during TB treatment, failure or longevity of treatment and relapse after treatment completion. On the other side, TB may worsen glycaemic control or lead to Impaired Glucose Tolerance (IGT) among TB patients [18]. Commonly, IGT normalizes after the cure of TB by treatment, but chances of developing type 2 diabetes in the future get increased [15]. Also, TB infection may adversely affect functioning of Pancreas that may subsequently cause IGT and TB pancreatitis [19].

Among other commonly occurring life style NCDs, Cardiovascular diseases (CVDs) are responsible for one third of deaths and of which more than 75% occur in LMICs [20]. According to an estimate of WHO report 2023, Worldwide, 1.28 billion adults aged 30–79 years have hypertension, most (two-thirds) living in low- and middle-income countries. One of the global targets for non-communicable diseases is to reduce the prevalence of hypertension by 33% by 2030 [21]. Hypertension plays key role in the development of CVDs and is also found responsible for a large number of deaths due to heart and kidney disease [5]. In addition to lifestyle factors, chronic infections, like TB, are also reported to increase the risk of hypertension and CVDs [22]. Nevertheless, a reverse association may also possibly exist, that hypertension may lead to an increased risk of developing TB. The reported prevalence of hypertension in TB patients varies from 0% to 50% [20, 21]. In this regard, it is suggested that, triggering of immunological responses due to TB infection can impair endothelial function and may lead to an increased risk of CVDs and possibly hypertension [5, 23]. Available data indicate that TB may play a role in the pathogenesis of CVDs through molecular mimicry and auto-immunity mediated by anti-HSP65 antibodies [23]. Parenchymal destruction of the lung tissues due to TB

[24] may affect the vascular structure and cause vasculitis and endarteritis, subsequently leading to a reduced cross-sectional area of the pulmonary vasculature and thereby pulmonary hypertension. Additionally, TB infection in kidneys may also cause hypertension, by, parenchymal destruction of the renal tissues and impairment of renal functions including ability of the kidney to regulate blood pressure [25, 26]. Vice-versa, hypertension may exert subtle effects on the immune system [27], which can increase the risk of TB.

The above mentions together strongly point out the severity of problem of multi-morbidity. In this multi-morbidity situation, one disease adversely affects presentation of other disease(s). Moreover, concomitant administration of drugs used to treat such diseases may exert effect(s) on the, therapeutic potential, toxicity and pharmacological activity (ADME) of each other. Therapeutic efficacies may get altered in synergistic, additive or antagonistic manner. In the present study, we aimed to determine the interactive effect of selected oral, anti-hyperglycaemic (HG) and anti-hypertensive (HT) drugs, belonging to different chemical classes, on the inhibitory and bactericidal activities of the first line anti-TB drugs, namely, Isoniazid (INH), Rifampicin (RFM), Ethambutol (EMB) and Streptomycin (STR), against extracellular and intracellular *M. tuberculosis*. Rationale behind studying these interactive effects is the long durations of treatments of Tuberculosis as well as the two co-morbidities, i.e., Diabetes and Hypertension.

Results of the study suggest, that, except, Metformin and Rosiglitazone, other anti-HG or anti-HT drugs studied may be given safely to TB patients receiving DOTs and suffering with either of the two co-morbidities.

## Materials and methods

### Materials

**Mycobacteria.** *Mycobacterium tuberculosis* H37Ra (*M. tb*, ATCC 25177, USA) was grown and maintained on Lowenstein-Jensen (L-J) medium. The bacterial suspension of three-week-old culture (on L-J medium) prepared in Middle brook 7H9 broth (Difco<sup>TM</sup>, MB from BD, Becton Dickinson, USA) containing 15% glycerol (as cryopreservative) was stored in aliquots at -80°C. Viable bacterial counts (colony forming units, cfu) were determined by plating the bacteria (50 µl, diluted in MB broth) on MB 7H11 agar medium supplemented with 10% OADC and 0.5% glycerol and incubating (37°C) until countable colonies appeared (3–4 weeks).

**Drugs.** All the drugs, namely, anti-tubercular drugs- Isoniazid (INH), Rifampicin(RFM), Ethambutol (EMB) and Streptomycin(STR), Oral anti-hyperglycaemic drugs (HG)- Acarbose (ACB), Acetohexamide (ACT), Glyburide (GLY), Metformin (MET), Repaglinide (REPA), Rosiglitazone (ROSI) and Sitagliptin (SITA) and Oral anti-hypertensive drugs (HT) - Atenolol (ATE), Hydrochlorothiazide (HCTZ), Prazosin (PRA), Ramipril (RAM), Valsartan (VAL), Nifedipine(NIF) and Verapamil (VER) were purchased from Sigma-Aldrich. All other chemicals used in this study were also purchased from Sigma-Aldrich, otherwise mentioned.

General information towards the functioning of anti-HG and anti-HT drugs is summarised in [Table 1](#).

### Methods

#### Determination of inhibitory activity against *M. tuberculosis* H37Ra

This *in vitro* assay evaluates potential of drugs/molecules to inhibit the growth of extracellular *Mtb*. Inhibitory potential was determined as Minimum Inhibitory Concentrations (MICs) of all the drugs, namely, anti-tubercular (anti-TB), anti-hyperglycaemic (HG) and anti-hypertensive

**Table 1. General information about the functioning of anti-hyperglycaemic (HG) and anti-hypertensive (HT) drugs.**

| S. No.                        | Anti-hyperglycaemic (HG) Drugs |                           |                                                                                                                                                                                                                                                                                        |
|-------------------------------|--------------------------------|---------------------------|----------------------------------------------------------------------------------------------------------------------------------------------------------------------------------------------------------------------------------------------------------------------------------------|
|                               | Name                           | Generic name              | Functioning                                                                                                                                                                                                                                                                            |
| 1.                            | Acarbose (ACB)                 | Acarbose                  | Delays digestion of carbohydrates, slows glucose absorption, thereby reduces postprandial glucose blood concentrations.                                                                                                                                                                |
| 2.                            | Acetohexamide (ACT)            | Acetohexamide             | Lowers blood sugar by stimulating pancreatic beta cells to secrete insulin and helps the body to utilise insulin efficiently.                                                                                                                                                          |
| 3.                            | Glyburide (GLY)                | Glibenclamide             | Increases insulin secretion from beta cells in the pancreas.                                                                                                                                                                                                                           |
| 4.                            | Metformin (MET)                | Metformin hydrochloride   | Decreases, production of glucose by liver, absorption of glucose by intestine, and improves insulin sensitivity by increasing uptake and utilization of peripheral glucose.                                                                                                            |
| 5.                            | Repaglinide (REPA)             | Repaglinide               | Stimulates insulin release from pancreatic beta cells.                                                                                                                                                                                                                                 |
| 6.                            | Rosiglitazone (ROSI)           | Rosiglitazone maleate     | Improves glycaemic control by improving insulin sensitivity. It mainly increases glucose uptake in skeletal muscles.                                                                                                                                                                   |
| 7.                            | Sitagliptin (SITA)             | Sitagliptin Phosphate     | Increases levels of natural substances called incretins, which in turn, increase insulin release (especially after a meal), improves glucose tolerance and decreases the production of glucose by liver.                                                                               |
| Anti- hypertensive (HT) drugs |                                |                           |                                                                                                                                                                                                                                                                                        |
| 1.                            | Atenolol (ATE)                 | Atenolol                  | Blocks the effects of the hormone epinephrine (adrenaline) thereby slows down and smoothen beating of heart. It also widens veins and arteries which lowers blood pressure and improves blood flow.                                                                                    |
| 2.                            | Hydrochlorothiazide (HCTZ)     | Hydrochlorothiazide       | Increases excretion of sodium and chloride in the urine by affecting the electrolyte reabsorption at distal renal tubule.                                                                                                                                                              |
| 3.                            | Prazosin (PRA)                 | Prazosin                  | Decreases blood pressure by dilating blood vessels.                                                                                                                                                                                                                                    |
| 4.                            | Ramipril (RAM)                 | Ramipril                  | Reduces reabsorption of sodium and water from the kidneys, relaxes smooth muscles in the arterioles thereby lowers blood pressure.                                                                                                                                                     |
| 5.                            | Valsartan (VAL)                | Valsartan                 | Relaxes and widens blood vessels thereby lowers blood pressure.                                                                                                                                                                                                                        |
| 6.                            | Nifedipine (NIF)               | Nifedipine (Procardia XL) | Inhibits the entry of calcium ions in vascular smooth muscle and myocardial cells, that reduces blood pressure and increases oxygen supply to the heart.                                                                                                                               |
| 7.                            | Verapamil (VER)                | Verapamil                 | Relaxes blood vessels and increases the supply of blood and oxygen to the heart by affecting movement of calcium into the cells of the blood vessels and heart. Also, it slows electrical activity in the heart to, control the rate of heart beat and reduces the work load of heart. |

<https://doi.org/10.1371/journal.pone.0292397.t001>

(HT), against *Mtb* H37Ra by Agar Proportion assay [28]. Briefly, stocks (5.0 mg/ml) of all the drugs were prepared in Dimethyl sulphoxide (DMSO). Serial 2.0-fold dilutions from stocks were also made in DMSO. To 1.9 mL MB 7H11 agar medium (in tubes, temp. 45–50 °C, with OADC supplement), 0.1 mL of drug(s) dilution was added. The contents were mixed and allowed to solidify as slants. From the cryopreserved stocks of *M tb*, bacterial suspension (1 mg/ml equivalent to 10<sup>8</sup> bacilli approximately) was made in normal saline containing 0.05% Tween-80. Ten µl of 1:10 dilution of this suspension (~ 10<sup>5</sup> bacilli) is inoculated into each tube and incubated at 37 °C for 4 weeks. The lowest concentration of a drug up to which there was no visible growth of bacilli was its Minimum Inhibitory Concentration (MIC). Anti-TB drugs, also served as positive control and the DMSO (only) served as negative control.

### Cytotoxicity of drugs towards Mouse Bone marrow derived Macrophages (MBMDM<sub>Φ</sub>)

All the Drugs were tested for cytotoxicity towards Primary macrophages obtained from the bone marrow of Swiss mouse, using MTT assay [29]. [Please note: Prior approval of the *in vivo* experiments in mouse, from the Institute's ethics committee (IAEC approval for small animal experimentation No. IAEC/2012/15/Renew 8/dated 14.6.2019, for one year) has been taken]. Mouse was euthanized by exposure to CO<sub>2</sub> and the femur bones were dissected out. The bones were trimmed at each end, and the marrow was flushed out (using 26-gauge needle) with 5 mL of Dulbecco's minimal essential medium (DMEM) supplemented with 10% FBS (Gibco, USA), 15% L-929 fibroblast (Obtained from Institutes Cell Culture Facility) conditioned

supernatant and non-essential amino acids (1.0% final concentration). Cells were washed twice and plated in 96 well tissue culture plates at a concentration of  $10^5$  cells per well ( $100 \mu\text{L}$ ) in supplemented DMEM. For adherence monolayers were then incubated 5 days with change of medium after 3 days at  $37^\circ\text{C}$  in 5%  $\text{CO}_2$ . Different concentrations of test drugs/DMSO (in DMEM containing 10% FBS only) were added 12 h after the adherence of cells. After 48 h,  $20 \mu\text{L}$  of MTS solution (Promega, USA) was added to each well and incubated for 2 h at  $37^\circ\text{C}$  in 5%  $\text{CO}_2$ . Absorbance was read at 490 nm using a plate reader. Absorbance shown by DMSO containing wells was taken as 100% survivors. A drug was considered toxic if it causes 50% inhibition in cell growth at a concentration 10-fold higher than its MIC.

### Interactive effect of anti-hyperglycaemic (HG) or anti-hypertensive (HT) drugs on the activity of anti-TB drugs

**Effect on the inhibitory activity against extracellular *M. tuberculosis*.** Interaction between anti-TB drugs, and anti-hyperglycaemic (HG) drugs or anti-hypertensive (HT) drugs was assessed by determining the Fractional Inhibitory Concentrations (FICs) [30–33] of anti-TB drugs, INH, RFM, EMB and STR, against *Mtb*, in presence of anti-HG or anti-HT drugs. For FIC determination, test concentrations of anti-TB drugs used were, two-fold dilutions starting from  $2.0 \times \text{MIC}$ , i.e.  $1.0 \times$ ,  $0.5 \times$ ,  $0.25 \times$ ,  $0.125 \times$  and  $0.0625 \times \text{MIC}$ . Each concentration of anti-TB drug was tested in combination with the single test concentration, i.e.,  $0.50 \times \text{MICs}$  of anti-HG or anti-HT drugs (at which the individual drug did not show any bacterial inhibition). Fifty  $\mu\text{L}$  each of the two drugs (containing the required final concentration) were added to the 7H11 medium. Remaining procedure was same as that used for MIC determination [28].

Fractional Inhibitory Concentrations (FICs) were calculated by dividing the MIC of drug in combination by the MIC of that drug alone ( $\text{FIC} = \text{MIC in combination} / \text{MIC alone}$ ) [30]. FICs,  $< 1.0$  indicate 'additive' effect,  $> 1.0$  indicate 'adverse' effect and  $\text{FIC} = 1.0$  indicate no interactive effect ('No effect') of anti-HG or anti-HT drugs on the inhibitory activity of anti-TB drugs against *M. tuberculosis*. The term 'No effect' indicate that two drugs act independently of each other.

**Effect on the bactericidal activity against intracellular *M. tuberculosis*.** Determination of the killing of intracellular *Mtb* was done by MBMDM<sub>Φ</sub> model. This model mimics growth environment of natural infection and demonstrate the ability of a drug or molecule to penetrate host cell membrane and phagocytic vacuole, bacilli residing within the vacuole and reach to the desired drug target of the bacilli. In addition, it also serves as the hypoxia induced model of latent TB infection, because tissue concentration of oxygen is considerably lower than that in the ambient air.

The study protocol was approved by the Institute's (CDRI's) Animal Ethics Committee, No. IAEC/2012/15/Renew8/ dated 14.6.2019 for a year. Mouse bone marrow-derived macrophages (BMDM) were prepared from femurs and tibia of Swiss mice. Cells were harvested in DMEM medium by flushing out the bone marrow using a syringe. Cells were collected by centrifugation ( $1000g \times 15 \text{ min}$ ) and re-suspended in 'complete medium' (DMEM with 10% foetal bovine serum (FBS), 15% culture supernatant of L-929 cells and 1% non-essential amino acids). After counting,  $10^6$ /ml cells were dispensed in 48-well culture plates, cells  $350 \mu\text{L}/\text{well}$  were incubated for 5 days in a  $\text{CO}_2$  incubator ( $37^\circ\text{C}$ , 5%  $\text{CO}_2$ ) for adherence and maturation.

Matured BMDM cells were infected with *Mtb* diluted in complete medium without antibiotics. Aggregated bacilli were dispersed by a short pulse (10s) of sonication which did not affect their viability (ascertained by cfu counts). Cells were infected with *Mtb* using a multiplicity of infection (MOI) of 5 (i.e., bacilli: macrophage, 5:1) e.g.,  $5 \times 10^6$  bacilli/well/ $350 \mu\text{L}$ , and

incubated for 5 days (37°C, 5% CO<sub>2</sub>). Later, the macrophage monolayer was washed extensively with DMEM to remove extracellular bacilli.

Dilutions of anti-TB (to prepare i.e., 4.0 x, 2.0 x, 1.0 x, 0.50 x or 0.25 x, MICs), anti-HG and anti-HT drugs were prepared in complete medium. Drug dilutions or drug combinations or medium alone (as a positive control) were dispensed in duplicate wells (350 µl/ well). For drug combinations, respective MICs of anti-TB drug(s) and test concentrations of anti-HG or anti-HT drugs were made in such a way that the required concentration is achieved in 175 µl, so that final volume of two drugs will be 350 µl. Plates were incubated for further 5 days (37°C, 5% CO<sub>2</sub>). For the determination of intracellular cfu, cells were lysed with saponin (0.1%, 100 µl/well, 15 min) and the lysates, after diluting in complete medium, were plated on MB 7H11 agar and incubated for 3–4 weeks (37°C, 5% CO<sub>2</sub>).

Killing of intracellular *Mtb* was assessed by counting the viable bacilli (colony forming units or CFUs) in lysates of the drug-treated or untreated infected macrophages. Percent (%) bacterial killing was calculated by considering CFUs of untreated wells (only medium) as 100% bacteria.

## Results

Minimum inhibitory concentrations (MICs) against *M tuberculosis* H37Ra and CC50 values (Cytotoxic Concentration that causes 50% reduction in cell viability) of all the drugs are shown in [Table 2](#). Importantly, all drugs (anti-TB, anti-HG and anti-HT), except anti-HT

**Table 2. Inhibitory activity (MICs) against *M tuberculosis* and Cytotoxicity (CC50) towards mouse macrophages, of anti-tubercular (TB), anti-hyperglycaemic (HG) and anti-hypertensive (HT) drugs.**

| S. No.                                             | Anti-tubercular (TB) drugs (Drug class)                         | MIC (µg/ml) | CC50 (µg/ml) |
|----------------------------------------------------|-----------------------------------------------------------------|-------------|--------------|
| 1                                                  | Isoniazid (hydrazide of isonicotinic acid)                      | 0.10        | >100.0       |
| 2                                                  | Rifampicin (derivative of rifamycin SV)                         | 0.40        | >100.0       |
| 3                                                  | Ethambutol (derivative of ethylenediamine)                      | 4.00        | >100.0       |
| 4                                                  | Streptomycin (aminoglycoside antibiotic from <i>S griseus</i> ) | 2.00        | >100.0       |
| <b>Anti-hyperglycaemic (HG) drugs (Drug class)</b> |                                                                 |             |              |
| 1                                                  | Acarbose (ACB) (Alpha-glucosidase inhibitor)                    | >100.0      | >250.0       |
| 2                                                  | Acetohexamide (ACT) (1 <sup>st</sup> generation-Sulfonylureas)  | >100.0      | >250.0       |
| 3                                                  | Glyburide (GLY) (2 <sup>nd</sup> generation-Sulfonylureas)      | >100.0      | >250.0       |
| 4                                                  | Metformin (MET) (Biguanide)                                     | 50.0        | >250.0       |
| 5                                                  | Repaglinide (REPA) (Thiazolidinediones)                         | >100.0      | >250.0       |
| 6                                                  | Rosiglitazone (ROSI) (Meglitinide)                              | 50.0        | >250.0       |
| 7                                                  | Sitagliptin (SITA) (Dipeptidyl peptidase IV inhibitors)         | >100.0      | >250.0       |
| <b>Anti- hypertensive (HT) drugs (Drug class)</b>  |                                                                 |             |              |
| 1                                                  | Atenolol (ATE) (Beta-blockers)                                  | >100.0      | >250.0       |
| 2                                                  | Hydrochlorothiazide (HCTZ) (Thiazide diuretics)                 | >100.0      | >250.0       |
| 3                                                  | Prazosin (PRA) (Alpha-1 Blocker)                                | >100.0      | 25.00        |
| 4                                                  | Ramipril (RAM) (#ACEIs)                                         | >100.0      | >250.0       |
| 5                                                  | Valsartan (VAL) (Angiotensin II antagonists)                    | 50.0        | >250.0       |
| 6                                                  | Nifedipine (NIF) (CCB*s- dihydropyridines)                      | 50.0        | >250.0       |
| 7                                                  | Verapamil (VER) (CCBs- non-dihydropyridines)                    | 50.0        | >250.0       |

Notes: 1. Cytotoxicity shown as CC<sub>50</sub>, was determined towards Mouse bone marrow derived macrophages.

2. #ACEIs- Angiotensin Converting Enzyme Inhibitors.

3. \*CCBs- Calcium channel blockers.

4. Values shown are average of two consecutive experiments.

<https://doi.org/10.1371/journal.pone.0292397.t002>

drug Prazosin, were found non-cytotoxic towards Mouse Bone marrow derived macrophages (MBMDM<sub>φ</sub>). Therefore, drug interaction experiments were not performed with Prazosin.

### Interactive effect of anti-hyperglycaemic (HG) or anti-hypertensive (HT) drugs on the activity of anti-TB drugs against *M tuberculosis*

#### Effect on the inhibitory activity of anti-TB drugs against extracellular *M. tuberculosis*.

Effect of anti-hyperglycaemic (anti-HG) and anti-hypertensive (anti-HT) drugs on the inhibitory activity (MICs) of the anti-TB drugs against *M. tuberculosis*, assessed as their Fractional Inhibitory Concentration (FICs) in combination, is shown, respectively, in **Table 3** and **Figs 1 and 2**.

**Effect of anti- hyperglycaemic (HG) drugs.** Among the seven anti-HG drugs tested, two drugs, namely, Glyburide and Repaglinide showed 'additive' effect (FIC < MIC) on all the four anti-TB drugs. Both drugs, Glyburide and Repaglinide, showed highest 'additive' effect on the activity of INH, as indicated by maximum, 8.0-fold reduction in the MIC of INH, i.e., FIC 0.125 µg/ml. Anti-HG drug Sitagliptin exerted 'additive' effect on INH, RFM and STR and 'No effect' (FIC = MIC, i.e., FIC = 1) on EMB [**Table 3**]. Anti-HG drugs, Acarbose and Acetohexamide exerted, additive effect on INH and RFM and 'No effect' on the inhibitory activity of EMB and STR. Anti-HG drug, Rosiglitazone showed adverse effect on Ethambutol (FIC >2.0) however, the drug exerted 'additive' effect on other three anti-TB drugs. Similarly, the anti-HG drug Metformin also imposed adverse effect on the inhibitory activity of Ethambutol. Although, Metformin exerted substantial 'additive' effect on the inhibitory activity of both INH and RFM, i.e., FIC 0.125 µg/ml and 'no effect' on the activity of STR [**Table 3 and Fig 1**]. These observations suggest that because Metformin and Rosiglitazone exerted an adverse effect on the anti-tubercular activity of EMB and that, these drugs, if given in combination(s) will impose negative and harmful impact on the TB treatment, hence should be avoided in TB patients receiving DOTs because Ethambutol play key role in the initial phase (Intensive phase) of treatment.

**Effect of anti- hypertensive (HT) drugs.** Among the six tested drugs, Hydrochlorothiazide (HCTZ) was found most suitable drug as it showed maximum 'additive' effect on 3 prime anti-TB drugs, namely, INH, RFM and EMB, by reducing MICs of these drugs by 4.0-fold [**Table 3 and Fig 2**]. Four anti-HT drugs, e.g., Ramipril, Valsartan, Nifedipine and Verapamil showed similar supportive (additive) response with two most important anti-TB drugs, INH and RFM and not effected inhibitory activity of other two anti-TB drugs EMB and STR. Atenolol showed 'additive' effect with only INH and imposed 'no effect' on the activity of other three anti-TB drugs. Some drug combinations provided higher 'additive' (nearly synergistic) effect, as evident by minimum FIC, i.e., 0.25µg/ml of anti-TB drugs, e.g., Combination of, Hydrochlorothiazide with, INH, RFM and EMB and Nifedipine with RFM. Importantly, all the anti-HT drugs produced either 'additive' or 'No effect' on the inhibitory activity of anti-TB drugs.

### Effect on the bactericidal activity of anti-TB drugs against intracellular *M. tuberculosis*

In a follow up, drugs' combinations of anti-HG or anti-HT, which showed beneficial (additive) effect on the inhibitory activity (MICs) of anti-TB drugs, were also examined for their effect on the bactericidal activity of anti-TB drugs against intracellular *Mtb*. Experiments were performed with the *Mtb* multiplying within bone marrow derived macrophages of mouse.

In *ex vivo* experiments, concentration of a drug that is available in the intracellular environment plays important role in its activity. Availability of a drug in turn depends on its capacity to penetrate inside the cell. Therefore, in these experiments, concentrations equal to MICs of anti-HG or anti-HT drugs were used for combinations. Drugs which did not show inhibitory

**Table 3. Summary of interactive effect of anti-hyperglycaemic (HG) and anti-hypertensive (HT) drugs on the inhibitory activity of anti-TB drugs against *M tuberculosis*.**

| Combination with, Anti-HG drugs | Inhibitory Concentrations ( $\mu\text{g/ml}$ ) of anti-TB drugs |                   |                               |                   |                               |                   |                               |                   |
|---------------------------------|-----------------------------------------------------------------|-------------------|-------------------------------|-------------------|-------------------------------|-------------------|-------------------------------|-------------------|
|                                 | INH (MIC 0.10)                                                  |                   | RFM (MIC 0.40)                |                   | EMB (MIC 4.0)                 |                   | STR (MIC 2.0)                 |                   |
|                                 | in combination                                                  |                   | in combination                |                   | in combination                |                   | in combination                |                   |
|                                 | MIC & [Fold reduction in MIC]                                   | FIC               | MIC & [Fold reduction in MIC] | FIC               | MIC & [Fold reduction in MIC] | FIC               | MIC & [Fold reduction in MIC] | FIC               |
| + ACB                           | 0.05 [2.00]                                                     | 0.50<br>*Additive | 0.20 [2.00]                   | 0.50<br>Additive  | 4.00<br>[None]                | 1.00<br>No effect | 2.00<br>[None]                | 1.0<br>No effect  |
| +ACT                            | 0.05 [2.00]                                                     | 0.50<br>Additive  | 0.20 [2.00]                   | 0.50<br>Additive  | 4.00<br>[None]                | 1.00<br>No effect | 2.00<br>[None]                | 1.00<br>No effect |
| +GLY                            | 0.0125 [8.00]                                                   | 0.125<br>Additive | 0.10 [4.00]                   | 0.25<br>Additive  | 1.00 [4.00]                   | 0.25<br>Additive  | 0.50 [4.00]                   | 0.25<br>Additive  |
| + MET                           | 0.0125 [8.00]                                                   | 0.125<br>Additive | 0.05 [8.00]                   | 0.125<br>Additive | >8.00<br>[>2.0]               | >2.00<br>Adverse  | 2.00<br>[None]                | 1.00<br>No effect |
| +REPA                           | 0.0125 [8.00]                                                   | 0.125<br>Additive | 0.10 [4.00]                   | 0.25<br>Additive  | 2.00 [2.00]                   | 0.50<br>Additive  | 1.00 [2.00]                   | 0.50<br>Additive  |
| +ROSI                           | 0.0125 [8.00]                                                   | 0.125<br>Additive | 0.10 [4.00]                   | 0.25<br>Additive  | >8.00<br>[>2.0]               | >2.00<br>Adverse  | 1.00 [2.00]                   | 0.50<br>Additive  |
| +SITA                           | 0.05 [2.00]                                                     | 0.50<br>Additive  | 0.10 [4.00]                   | 0.25<br>Additive  | 4.00<br>[None]                | None<br>No effect | 1.00 [2.00]                   | 0.50<br>Additive  |
| With Anti-HT drugs              |                                                                 |                   |                               |                   |                               |                   |                               |                   |
| + ATE                           | 0.05 [2.00]                                                     | 0.50<br>Additive  | 0.40 [None]                   | 1.00<br>No effect | 4.00<br>[None]                | 1.00<br>No effect | 2.00<br>[None]                | 1.00<br>No effect |
| + HCTZ                          | 0.025 [4.00]                                                    | 0.25<br>Additive  | 0.10 [4.00]                   | 0.25<br>Additive  | 1.00<br>[4.00]                | 0.25<br>Additive  | 2.00<br>[none]                | 1.00<br>No effect |
| + RAM                           | 0.05 [2.00]                                                     | 0.50<br>Additive  | 0.20 [2.00]                   | 0.50<br>Additive  | 4.00<br>[None]                | 1.00<br>No effect | 2.00<br>[None]                | 1.00<br>No effect |
| + VAL                           | 0.05 [2.00]                                                     | 0.50<br>Additive  | 0.20 [2.00]                   | 0.50<br>Additive] | 4.00<br>[None]                | 1.00<br>No effect | 2.00<br>[None]                | 1.00<br>No effect |
| + NIF                           | 0.05 [2.00]                                                     | 0.50<br>Additive  | 0.10 [4.00]                   | 0.25<br>Additive] | 4.00<br>[None]                | 1.00<br>No effect | 2.00<br>[None]                | 1.00<br>No effect |
| + VER                           | 0.05 [2.00]                                                     | 0.50<br>Additive  | 0.20 [2.00]                   | 0.50<br>Additive  | 4.00<br>[None]                | 1.00<br>No effect | 2.00<br>[None]                | 1.00<br>No effect |

Notes: 1. \*Interactive effect was assessed by determining the Fractional Inhibitory Concentration(s) (FICs, MIC of drug in combination / MIC of drug alone) of anti-TB drugs, INH-Isoniazid, RFM-Rifampicin, EMB-Ethambutol and STR -Streptomycin, against *Mtb*, in combination with 0.5x MIC of anti-hyperglycaemic (HG) or anti-hypertensive (HT) drugs. Drugs which showed MIC >100.0  $\mu\text{g/ml}$  were combined at 100.0  $\mu\text{g/ml}$ .

2. Anti-hyperglycaemic (HG) drugs - ACB- Acarbose, ACT-Acetoheamide, GLY- Glyburide, MET- Metformin, REPA- Repaglinide, ROSI- Rosiglitazone, SITA- Sitagliptin.

Anti-hypertensive (HT) drugs - ATE- Atenolol, HCTZ- Hydrochlorothiazide, RAM- Ramipril, VAL- Valsartan, NIF- Nifedipine and VER- Verapamil.

3. Interactive effect(s) was decided on the value of FIC as follows

if MIC in combination is equal to MIC alone, FIC = 1.00; 'No effect'.

if MIC in combination is lesser than MIC alone, FIC <1.00; 'Additive' effect.

if MIC in combination is higher than MIC alone, FIC >1.00; 'Adverse' effect.

4. Data shown are average of two consecutive experiments.

<https://doi.org/10.1371/journal.pone.0292397.t003>

activity up to 100.0  $\mu\text{g/ml}$  (MICs >100.0) were used at 100.0  $\mu\text{g/ml}$  concentration. Bactericidal activity of anti-TB drugs was observed at their 0.25 x MIC, 0.50 x MIC, 1.0 x MIC and 2.0 x MICs [Fig 3]. In combination studies, concentrations of anti-TB drugs used were those which showed 'additive' activity with anti-HG or anti-HT drugs, *in vitro* studies.



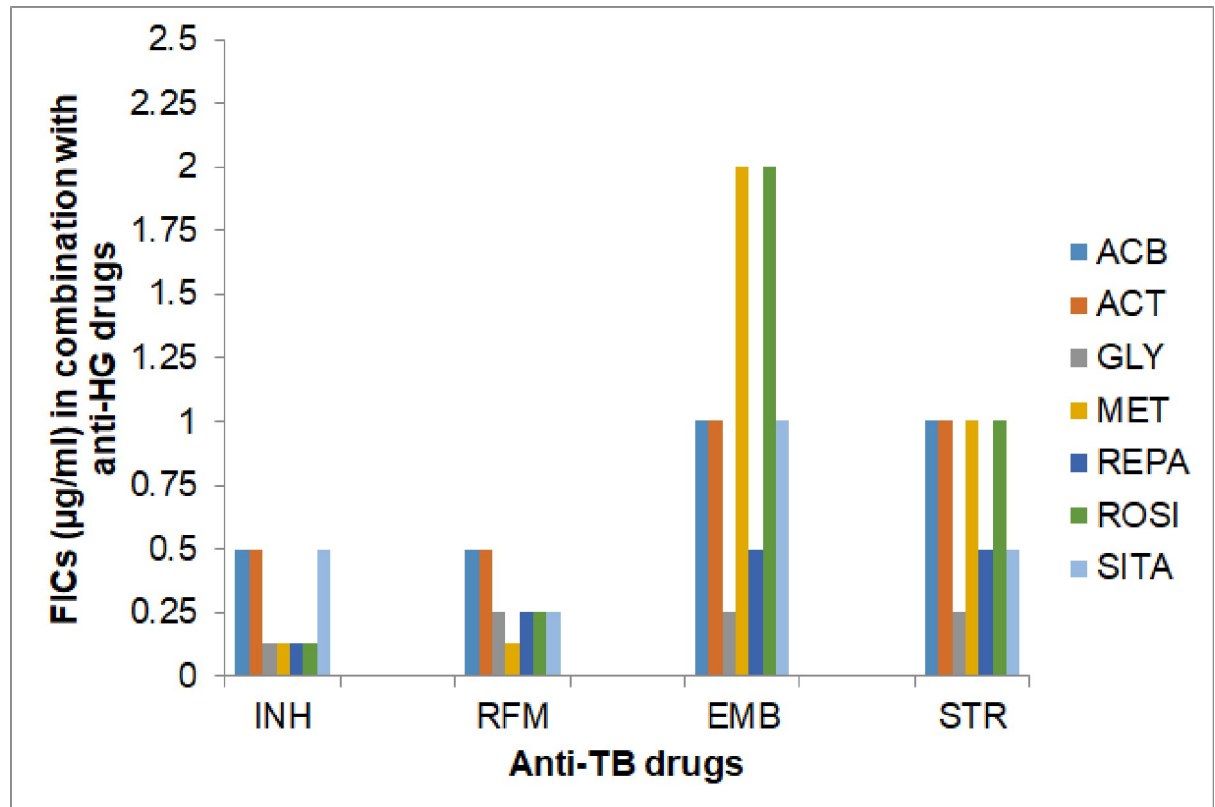

**Fig 1. Interactive effect of anti-hyperglycaemic (HG) drugs on the inhibitory activity (MIC) of anti-TB drugs against *M tuberculosis*, shown as Fractional Inhibitory Concentrations (FICs).** Notes: 1. Anti-TB drugs, INH-Isoniazid, RFM-Rifampicin, EMB-Ethambutol and STR- Streptomycin, against *Mtb*. 2. Anti-hyperglycaemic Drugs: ACB- Acarbose, ACT-Acetohehexamide, GLY- Glyburide, MET- Metformin, REPA- Repaglinide, ROSI- Rosiglitazone, SITA- Sitagliptin. 3. Data shown are average of two consecutive experiments.

<https://doi.org/10.1371/journal.pone.0292397.g001>

**Effect of anti- hyperglycaemic (HG) drugs.** Results of interactive effect of anti-HG drugs on the bactericidal activity of anti-TB drugs [Table 4 and Fig 4] revealed, that, anti-HG drug, Glyburide showed 'synergistic' effect on the all the four anti-TB drugs as evident by increased bacterial killing by, INH (62.97% higher), RFM (25.0% higher), EMB (44.98% higher) and STR (32.0% higher) than the respective drugs alone. Anti-HG drugs, Repaglinide and Rosiglitazone imposed 'synergistic' effect on the bactericidal activity of three anti-TB drugs, INH, RFM and STR, as evident by a substantial increase of 25.0% to 63.0% in bacterial killing. Anti-HG drug, Sitagliptin brought an impressive increase in the bactericidal efficacy of INH (62.73% higher killing) and STR (31.73% higher killing). Anti-HG drugs, Acarbose and Acetohehexamide were tested only in combination with INH or RFM, where they exerted either only marginal additive effect on RFM (i.e., about 6.50% higher bacterial killing) or 'no effect' on the bactericidal efficacy of INH. Results showed that, among the combinations tested no anti-hyperglycaemic (anti-HG) drug exerted any adverse effect on the bactericidal activity of anti-TB drugs.

**Effect of anti- hypertensive (HT) drugs.** Depending on the results of inhibitory activity experiments where anti-HT drugs not imposed any effect on the anti-TB drugs, very few combinations were tested to observe the effect of anti-HT drugs on the bactericidal activity of anti-TB drugs. Results [Table 4 and Fig 5] showed, that, none of the six anti-HT drugs exerted any effect (termed as 'None') on the bactericidal activity of INH. Similarly, five drugs (except ATE) studied in combination with RFM, produced either only very 'marginally additive' or 'no effect'. Only one anti-HT drug, HCTZ enhanced the bacterial killing of EMB by 44.89% with

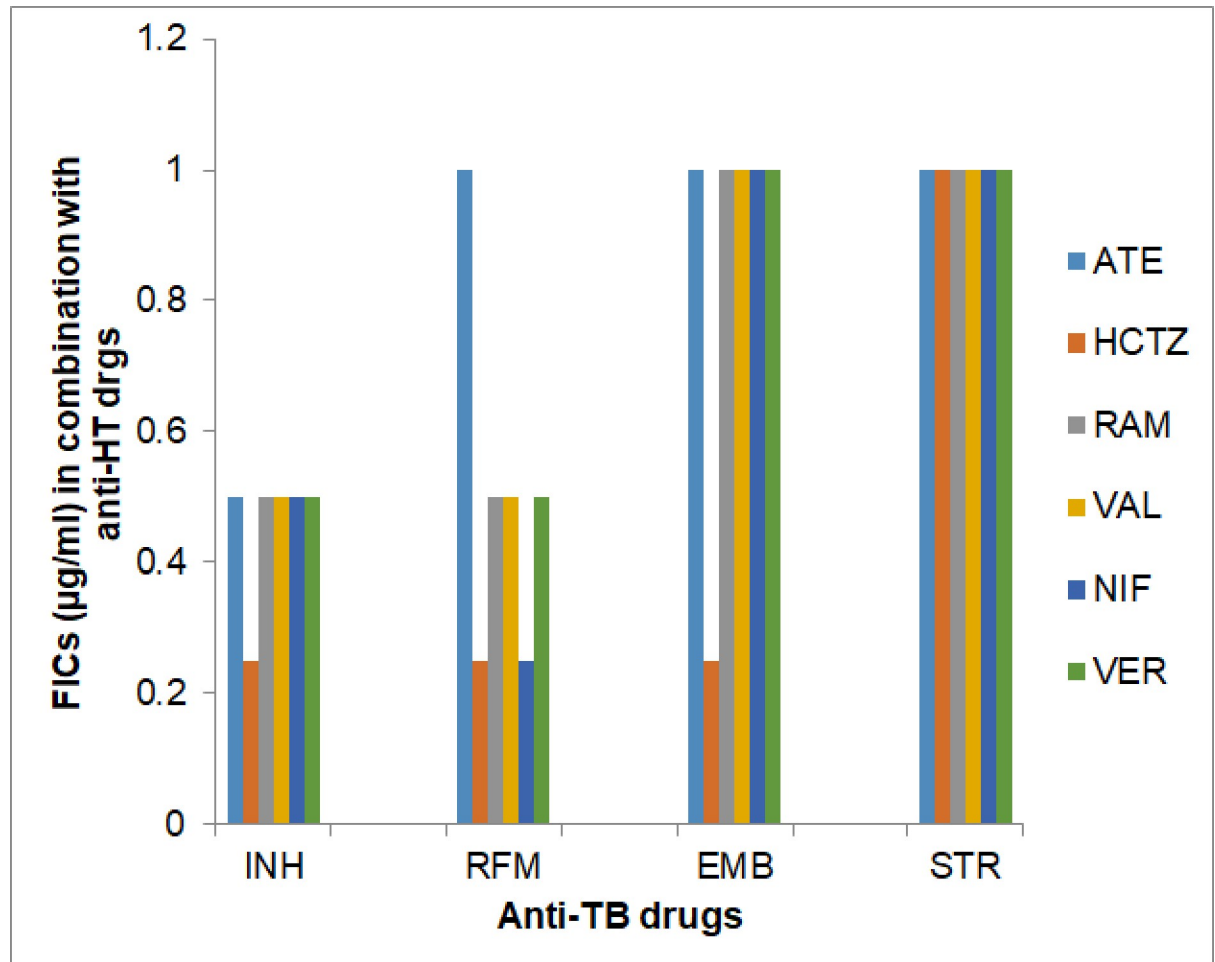

**Fig 2. Interactive effect of anti-hypertensive (HT) drugs on the inhibitory activity (MIC) of anti-TB drugs against *M. tuberculosis*, shown as Fractional Inhibitory Concentrations (FICs).** Anti-hypertensive (HT) Drugs: ATE-Atenolol, HCTZ- Hydrochlorothiazide, RAM-Ramipril, VAL-Valsartan, NIF- Nifedipine, VER-Verapamil. Notes: remaining details are same as in Fig 1.

<https://doi.org/10.1371/journal.pone.0292397.g002>

0.50 x MIC of EMB. Based on the results of *in vitro* experiments, no combination was studied with Streptomycin [Table 4].

Together, results [Tables 3 and 4] indicate, that, except, Rosiglitazone and Metformin (a key player in the treatment of Type 2 diabetes), all other anti-HG or anti-HT drugs included in the study may be given safely to TB patients receiving treatment under DOTS (Directly Observed Treatment, short course) program, recommended by WHO. Furthermore, synergistic or additive effects obtained with these drug combinations may allow use of reduced doses of drugs. This, in turn may reduce the harmful side effects of these drugs.

## Discussion

In the present study, Oral anti-hyperglycaemic (HG) and anti-hypertensive (HT) drugs, belonging to different, chemical classes and functional mechanisms (Table 1) were included. Findings suggest, that, among the seven anti-HG drugs, **Glyburide** and **Repaglinide** were found most promising as they exerted additive effect on the Inhibitory activity and synergistic/additive effect on the Bactericidal activity of all the four anti-TB drugs. Available literature related to anti-HG drugs indicate that, the drug **Acarbose (ACB)** shown its capability to,

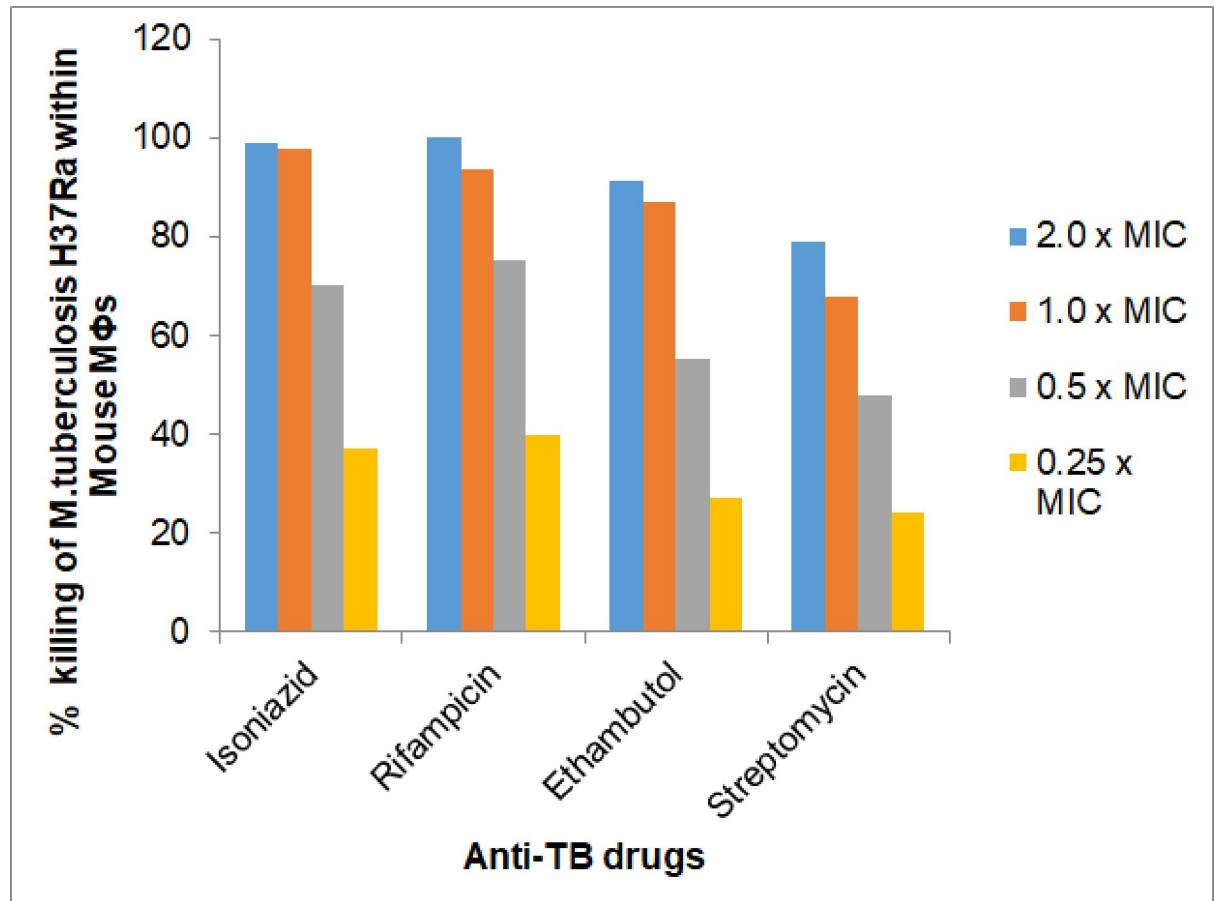

**Fig 3. Killing of intracellular *M. tuberculosis* multiplying within mouse bone marrow derived macrophages by anti-TB drugs at different concentrations, e.g., 2.0 x, 1.0 x, 0.5 x and 0.25 x, MICs.** Notes: Remaining details are same as in Fig 1.

<https://doi.org/10.1371/journal.pone.0292397.g003>

disrupt bio-film formation of *Mtb* H37Rv [34] and may, therefore, be a potential candidate towards repurposing for treatment of TB [35]. In the present study, ACB showed ‘additive’ effect on INH and RFM, whereas ‘no effect’ on the activity of EMB and STR to inhibit the growth of *Mtb*. Another drug, **Glyburide**, has been shown to produce potentially adverse side effects on neutrophil and monocyte-mediated immune responses against *Mtb* (reducing IL-1 $\beta$  and IL-8 production) thereby exacerbating susceptibility of diabetes patients to *Mtb* infection [36]. In our study, however, Glyburide has not shown any adverse effect on *in vitro* activity of four anti-TB drugs. It showed ‘additive’ effect with all the 4 drugs. Further, the drug, **Repaglinide** (a K<sup>+</sup>ATP-channel blocker), has been reported to promote polarization of macrophages towards weakly microbicidal, M2 macrophages, with increased expression of the M2 marker CD206 [37]. This action may increase susceptibility of diabetic individuals to TB and other bacterial infectious disease [38]. In our study, Repaglinide showed an ‘additive effect’ with all the four Anti-TB drugs. Reports on **Metformin**, (used either alone or in combination with other anti-hyperglycaemics) suggest, that, clinically relevant metabolic interactions with metformin, are not possible as this compound is not metabolised and does not inhibit the metabolism of other drugs [38]. Recent data on MET indicate its potential role in improving the effective treatment of TB, suggesting that it can be used as a promising candidate host adjunctive therapy for TB cases [39]. Metformin has also been shown to enhance mycobacterial

**Table 4. Summary of interactive effect of anti-hyperglycaemic (HG) and anti-hypertensive (HT) drugs on the bactericidal efficacy of anti-TB drugs against intracellular *M tuberculosis*.**

| Combination with,<br>Anti- HG drugs | Bacterial killing by anti-TB drugs |                    |                                 |                    |                                 |                    |                                 |                    |
|-------------------------------------|------------------------------------|--------------------|---------------------------------|--------------------|---------------------------------|--------------------|---------------------------------|--------------------|
|                                     | INH                                |                    | RFM                             |                    | EMB                             |                    | STR                             |                    |
|                                     | in combination                     |                    | in combination                  |                    | in combination                  |                    | in combination                  |                    |
|                                     | % increase in Bacterial killing    | Interactive effect | % increase in Bacterial killing | Interactive effect | % increase in Bacterial killing | Interactive effect | % increase in Bacterial killing | Interactive effect |
| + ACB                               | 2.17                               | None               | 6.52                            | M. Additive        | Not done                        |                    | Not done                        |                    |
| +ACT                                | 2.06                               | None               | 6.41                            | M. Additive        | Not done                        |                    | Not done                        |                    |
| +GLY                                | 62.97                              | Synergistic        | 25.00                           | Synergistic        | 44.98                           | Synergistic        | 32.00                           | Synergistic        |
| + MET                               | 63.00                              | Synergistic        | 25.00                           | Synergistic        | Not done                        |                    | Not done                        |                    |
| +REPA                               | 63.00                              | Synergistic        | 25.00                           | Synergistic        | 13.04                           | Additive           | 32.00                           |                    |
| +ROSI                               | 62.73                              | Synergistic        | 25.00                           | Synergistic        | Not done                        |                    | 32.00                           |                    |
| +SITA                               | 2.16                               | None               | 23.91                           | Synergistic        | Not done                        |                    | 31.73                           |                    |
| Anti-HT drugs                       |                                    |                    |                                 |                    |                                 |                    |                                 |                    |
| + ATE                               | 1.09                               | None               | Not done                        |                    | Not done                        |                    | Not done                        |                    |
| + HCTZ                              | 2.06                               | None               | 6.52                            | M. Additive        | 44.89                           | Synergistic        | Not done                        |                    |
| + RAM                               | 1.06                               | None               | None                            | None               | Not done                        |                    | Not done                        |                    |
| + VAL                               | 0.87                               | None               | None                            | None               | Not done                        |                    | Not done                        |                    |
| + NIF                               | 2.17                               | None               | 6.41                            | M. Additive        | Not done                        |                    | Not done                        |                    |
| + VER                               | 1.09                               | None               | 6.20                            | M. Additive        | Not done                        |                    | Not done                        |                    |

Notes: 1. Increase in bacterial killing was calculated by subtracting % bacterial killing by anti-TB drug alone at that concentration (x MIC) from % bacterial killing by the drug in combination (at the same respective x MIC used alone) with anti-HG or anti-HT drugs.

2. Concentrations of anti-TB drugs used in combination were selected on the basis of their inhibitory activity results.

3. Concentration(s) of anti-HG/anti-HT drugs used in combination were 1.0 x MIC. Drugs which showed MIC >100.0 µg/ml were combined at 100.0 µg/ml.

4. Not done- Based on the results of bacterial inhibition (*in vitro* MIC/FIC), *ex vivo* experiment was not performed.

5. Criteria for deciding Interactive effect of anti-HG/ anti-HT drugs on the bactericidal efficacy of anti-TB drugs was as follows

(a) ≤ 5% increase in the bacterial killing- showed as 'None'.

(b) 6–10% increase in the bacterial killing- as, 'Marginally additive (M. Additive)'.

(c) 11–20% increase in bacterial killing- as, 'Additive', and

(d) >20% increase in bacterial killing- as, 'Synergistic', effect.

6. Data shown are average of two consecutive experiments.

<https://doi.org/10.1371/journal.pone.0292397.t004>

clearance in mice [40] and is found to lower rates of *M. tuberculosis* infection in humans [41]. Other beneficial effects of Metformin reported are, reducing risk of, developing active tuberculosis [42, 43], mortality [44] and relapse [39] and increasing culture conversion [40, 45], thereby supporting successful treatment. All these positive effects, may potentially be associated to glycaemic control, increased production of mitochondrial reactive oxygen species (mROS) and enhanced killing of *M. tuberculosis*. Contrary to this, Metformin has been shown to induce anti-inflammatory effects and inhibits pathways such as mammalian target of rapamycin (mTOR) signalling, which are important in the host defence against *Mycobacterium tuberculosis* [46]. These contrary observations of studies may be due to different doses used, heterogeneity of the disease, including cavity or extent of infiltration and bacterial burden. Authors also mentioned that generally anti-TB drugs are effective in treating drug-sensitive TB patients, even with DM. Therefore, additional HDT effect of **Metformin** may not be essential for successful TB treatment. However, it may be a candidate HDT for TB in patients with a high disease burden, such as in that case of cavitary pulmonary TB [45].

In the present study, we found an 'additive' effect of **MET** on INH and RFM and no effect on STR. Importantly, FIC values of INH and RFM, were minimum, i.e., 0.125µg/ml, in

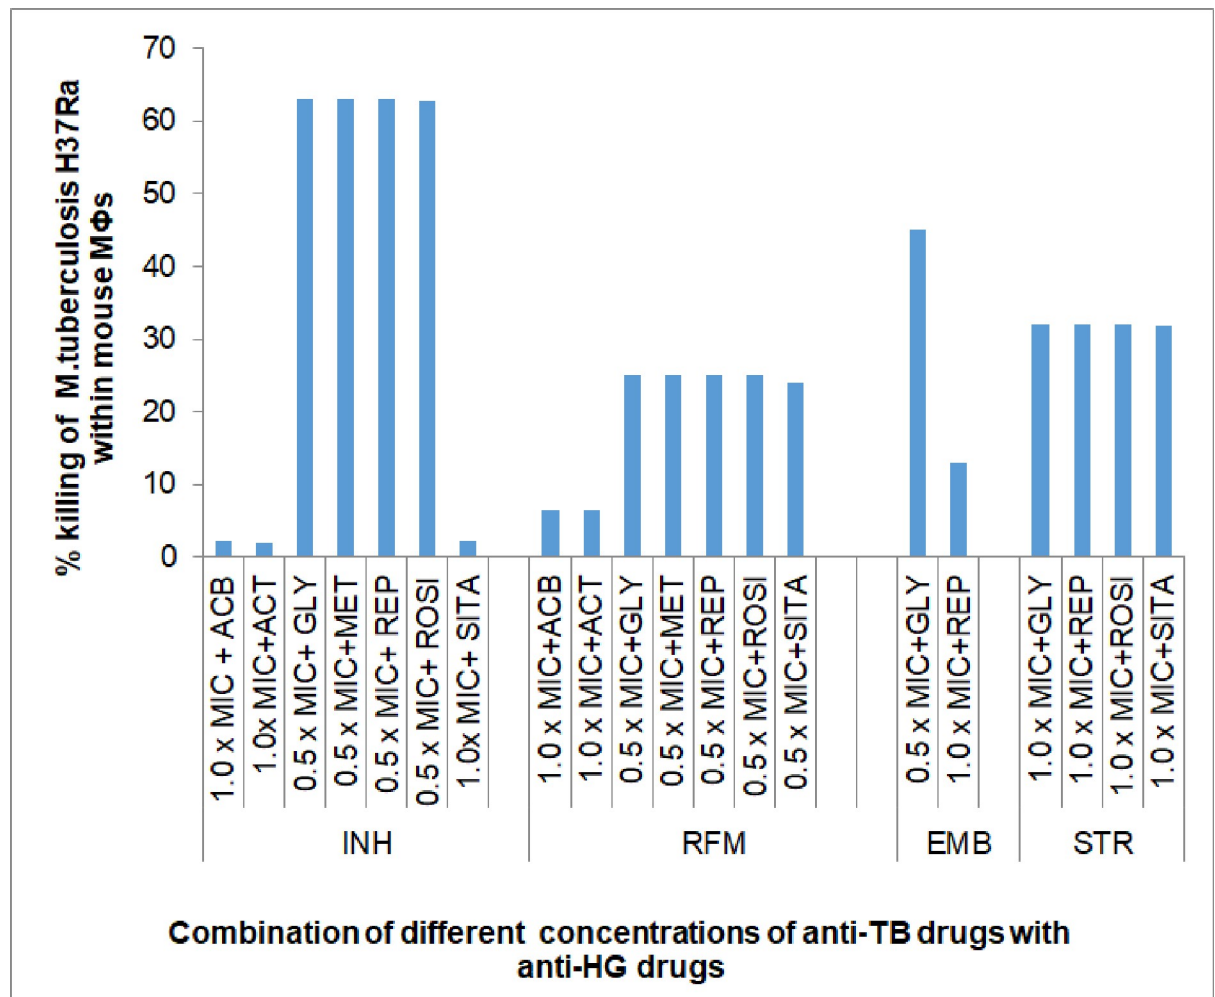

**Fig 4. Interactive effect of anti-hyperglycaemic (HG) drugs on the bactericidal activity (% bacterial killing) of anti-TB drugs against intracellular *M. tuberculosis* multiplying within mouse bone marrow derived macrophages.** Notes: Results are shown as per cent (%) bacterial killing by anti-TB drugs when used in combination with anti-HG drugs: ACB- Acarbose, ACT-Acetoheaxamide, GLY- Glyburide, MET- Metformin, REPA- Repaglinide, ROSI- Rosiglitazone, SITA- Sitagliptin. Notes: Remaining details are same as in Fig 1.

<https://doi.org/10.1371/journal.pone.0292397.g004>

combination with Metformin. However, the drug (MET) exerted an adverse effect on Ethambutol, a very important first line anti-TB drug, given in the initial Intensive phase of treatment of TB under DOTs program.

Another anti-HG drug, **Rosiglitazone**, improves glycaemic control by improving insulin sensitivity. Being an inducer of CYP2C8, the anti-TB drug Rifampicin has been shown to affect the pharmacokinetics of rosiglitazone in healthy subjects [47]. The study however, provides reasons to believe that co-administration of rifampicin may affect the disposition of rosiglitazone in diabetic patients also, and this may lead to poor glycaemic control. The study, therefore, suggest that, caution should be taken during the co-administration of rifampicin and rosiglitazone [47]. However, in the present study we found that **ROSI** supported the activity of three anti-TB drugs, INH, RFM and STR. Importantly, **ROSI** behaved in a similar manner to that of **MET**, i.e., imparted ‘additive’ effect on INH (FIC 0.125µg/ml) and RFM (FIC 0.25µg/ml), but showed an ‘adverse’ effect on the activity of Ethambutol.

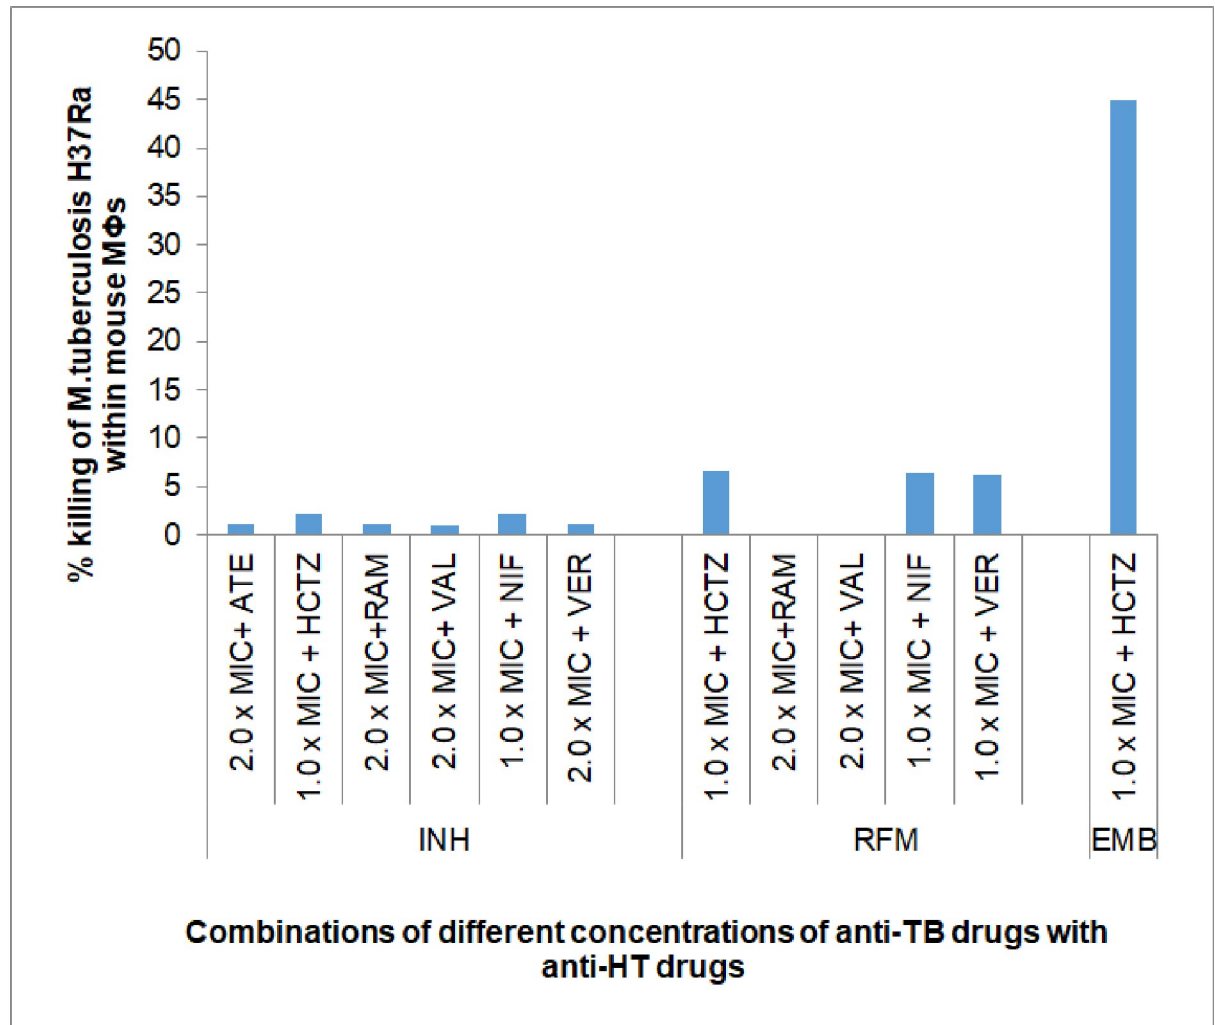

**Fig 5. Interactive effect of anti-hypertensive (HT) drugs on the bactericidal activity (% bacterial killing) of anti-TB drugs against intracellular *M. tuberculosis* multiplying within mouse bone marrow derived macrophages.** Anti-HT drugs: ATE-Atenolol, HCTZ-Hydrochlorothiazide, RAM-Ramipril, VAL-Valsartan, NIF- Nifedipine, VER-Verapamil. Notes: Remaining details are same as in Fig 4.

<https://doi.org/10.1371/journal.pone.0292397.g005>

No information is available in the literature regarding any effect of anti-HG drugs, **Acetohexamide** (1st generation-Sulfonylureas) and **Sitagliptin** ((Dipeptidyl peptidase IV inhibitors) on the disease outcome or treatment of tuberculosis. However, the two drugs imparted supportive effect on the activity of all the four anti-TB drugs.

So far, effect of anti-HT drugs is concerned, all showed additive effect on the inhibitory activity of INH and RFM (except **Atenolol**). Drug **Hydrochlorothiazide** also showed 'additive' effect on the inhibitory and 'synergistic' effect on the bactericidal activity of Ethambutol. Regarding the interaction between anti-hypertensive and anti-TB drugs, available reports showed that the problem of blood pressure control is often observed in TB patients, who are receiving dual, anti-TB and anti-HT treatments. It may be due to the complex drug-drug interactions between the anti-TB drug, rifampicin (an inducer of CYP 450 system) and anti-hypertensive drugs. Therefore, it may be of clinical importance to understand these interactions to help clinicians to suggest safe anti-hypertensive drug(s) for TB patients taking anti-TB medications concomitantly. In this regard, a case report showed that RFM reduced plasma

concentration of, anti-hypertensive drugs, **Atenolol** (belong to class of Beta blockers [48], **Nifedipine** (a calcium-channel blocker, CCB- dihydropyridines) and **Verapamil** (CCBs- non-dihydropyridines [49, 50], therefore, reducing their therapeutic efficacy. Recommendations based on case study reviews, suggested that, in patients with hypertension when anti-tuberculosis treatment which include rifampicin is started, the use of calcium channel blockers and classes 1 and 2  $\beta$ -blockers should be avoided. In such patients, use of, Angiotensin-converting enzyme inhibitors (e.g., **Ramipril**), **Valsartan** (Angiotensin II antagonists) and diuretics (like **hydrochlorothiazide**) should be preferred, as clinically relevant interactions are not expected with these classes of drugs and are shown to be effective [51, 52]. Anti-HT drug, **Verapamil** has been shown to play an important role in the treatment of TB patients in two ways, (i) by transforming non-killing macrophages in to bactericidal, and (ii) improving the therapeutic efficacy of anti-TB drugs by restoring their activity by acting as efflux pump inhibitor. These strategies will be beneficial with the view that they may help in killing of both drug susceptible or drug resistant *Mtb* [53, 54].

Our results showed, that, none of the six anti-HT drugs included in the study, imposed any adverse effect on the inhibitory potential of any of the four Anti-TB drugs. In fact, all the anti-HT drugs except **Atenolol**, showed additive/supportive effect with three prime anti-TB drugs, namely, INH, RFM and EMB with their FICs, <1.00. Effect of **Atenolol** on these drugs was also, 'None' (**no effect**). No anti-HT drug exerted any effect on the anti-TB drug Streptomycin.

Many studies [55–58] have shown that combination of drugs provide better treatment outcome for any infectious or life style disease, may be, due to different mechanism of action of different drugs. Also, use of drug combination reduces adverse effects due to use of low concentrations of individual drug(s).

## Conclusion

Co-existence of most prevalent life style disorders like diabetes and/or hypertension increases risk of, failure of anti-TB treatment (identified by positive culture after two months of treatment and relapse after treatment completion), deaths during treatment and development of drug resistant TB. One of the causes of development of drug resistance may be inadequate drug plasma levels due to unrecognized drug-drug interactions.

Potential interferences are expected to occur between anti-TB drugs and other drugs concomitantly administered in TB patients, also suffering with these dual or multi-morbidities. Drug- drug interactions may be produced by drugs/agents that are known to induce or inhibit the cytochrome P450 (CYP) system. Within the limits of present study anti-TB drug RFM is widely known for its effect to induce CYP system, therefore, reducing the serum /plasma concentrations of other co-administered drugs that are CYP substrates and thereby reducing their therapeutic efficacy. However, almost no report is available regarding the effect of anti-HG or anti-HT drugs on the effectiveness of anti-TB drugs.

In our understanding this is the first report demonstrating the effect of anti-HG and/or anti-HT drugs on the inhibitory and bactericidal activities of anti-TB drugs against *M. tuberculosis*. Such study is very much required because all these medications, e.g., anti-TB, anti-HG or anti-HT, are to be given together for very long periods. Further, this study is also very important from the view point of the fact that, anti-TB treatment regimens, (i.e., DOTs programme), is based on the set guidelines recommended by WHO and are to be given as such. Clinicians are, therefore, left with the option of selecting anti-hyperglycaemic and/or anti-hypertensive drugs to be given to the TB patients suffering with such co-/multi-morbidities.

## Supporting information

**S1 File.**  
(DOCX)

## Acknowledgments

We are grateful to Director, CSIR-Central Drug Research Institute, Lucknow, India, for providing necessary facilities and support to carry out the work. This paper has CSIR-CDRI communication number 10669.

## Author Contributions

**Conceptualization:** Vinita Chaturvedi.

**Data curation:** Priyanka Trivedi.

**Formal analysis:** Priyanka Trivedi, Vinita Chaturvedi.

**Investigation:** Vinita Chaturvedi.

**Validation:** Vinita Chaturvedi.

**Writing – original draft:** Vinita Chaturvedi.

**Writing – review & editing:** Vinita Chaturvedi.

## References

1. Global TB Report 2022, Geneva, World Health Organization 2022.
2. Creswell J, Raviglione M, Ottmani S, Migliori GB, Uplekar M, Blanc L, Sotgiu G, Lönnroth K. Series: Update on tuberculosis<sup>†</sup> - Tuberculosis and non-communicable diseases: Neglected links and missed opportunities. *Eur Respir J* 2011; 3: 1269–82.
3. Huangfu P, Ugarte-Gil C, Golub J, Pearson F, Critchley J. The effects of diabetes on tuberculosis treatment outcomes: an updated systematic review and meta-analysis. *Int J Tuber Lung Dis* 2019; 23: 783–96. <https://doi.org/10.5588/ijtld.18.0433> PMID: 31439109
4. Ugarte-Gil C, Alisjahbana B, Ronacher K, Riza AL, Koesoemadinata RC, Malherbe ST, et al. Diabetes Mellitus Among Pulmonary Tuberculosis Patients From 4 Tuberculosis-endemic Countries: The TANDEM Study. *Clin Infect Dis* 2020; 70:780–8. <https://doi.org/10.1093/cid/ciz284> PMID: 30958536
5. Huaman MA, Henson D, Ticona E, Sterlin TA, Garvy BA. Tuberculosis and Cardiovascular Disease: Linking the Epidemics. *Trop Dis Travel Med Vaccines* 2015; 1:10. <https://doi.org/10.1186/s40794-015-0014-5> PMID: 26835156
6. International Diabetes Federation Diabetes Atlas 2022 Reports.
7. WHO Diabetes Report, 5 April 2023.
8. Ruslami R, Aarnoutse E, Alisjahbana B, Van Der Ven AJAM, Crevel Rv. Implications of the global increase of diabetes for tuberculosis control and patient care. *Trop Med Inter Health* 2010; 15:1289–99.
9. Remais JV, Zeng G, Li G, Tian L, Engelgau MM. Convergence of non-communicable and infectious diseases in low- and middle-income countries. *Int J Epidemiol* 2013; 42:221–227. <https://doi.org/10.1093/ije/dys135> PMID: 23064501
10. Yorke E, Atiase Y, Akpalu J, Sarfo-Kantanka O, Boima V, Dey ID. The Bidirectional Relationship between Tuberculosis and Diabetes. *Hindawi Tuberculosis Research and Treatment*. Vol 2017, Article ID 1702578, 6 pages. <https://doi.org/10.1155/2017/1702578> PMID: 29270319
11. Anand T, Kishore J, Isaakidis P, Gupte HA, Kaur G, Kumari S, Diwakar Jha, Shekhar Grover. (2018) Integrating screening for non-communicable diseases and their risk factors in routine tuberculosis care in Delhi, India: A mixed-methods study. *PLOS ONE* 2018; 13(8): e0202256.
12. Jeon CY, Murray MB. Diabetes Mellitus Increases the Risk of Active Tuberculosis: A Systematic Review of 13 Observational Studies. *PLOS Medicine* 2008; 5: e152. <https://doi.org/10.1371/journal.pmed.0050152> PMID: 18630984



13. Alisjahbana B, Sahiratmadja E, Nelwan EJ, Purva AM, Ahmad Y, Ottenhoff THM. The effect of type 2 diabetes mellitus on the presentation and treatment response of pulmonary tuberculosis. *Clin Infect Dis* 2007; 4: 428–35. <https://doi.org/10.1086/519841> PMID: 17638189
14. Shewade HD, Jeyashree K, Mahajan P, Shah AN, Kirubakaran R, Rao R. Effect of glycaemic control and type of diabetes treatment unsuccessful TB treatment outcomes among people with TB-Diabetes: A systematic review. *PLOS One* 2017; 12: e0186697.
15. Wilson RM. Infection and diabetes mellitus. In: Pickup JC and Williams G, Ed. *Textbook of Diabetes*. Blackwell Scientific Publication, Oxford, UK; 1991. pp. 813–819.
16. Stevenson CR, Critchley JA, Forouhi NG, Roglic G, Williams BG, Dye C, et al. Diabetes and the risk of tuberculosis: A neglected threat to public health? *Chronic Illness* 2007; 3: 228–245. <https://doi.org/10.1177/1742395307081502> PMID: 18083679
17. Mugusi F, Swai ABM, Alberti KGMM, McLarty DG. Increased prevalence of diabetes mellitus in patients with pulmonary tuberculosis in Tanzania. *Tuberculosis* 1990; 71: 271–276. [https://doi.org/10.1016/0041-3879\(90\)90040-f](https://doi.org/10.1016/0041-3879(90)90040-f) PMID: 2267680
18. Nichols GP. Diabetes among young tuberculous patients; a review of the association of the two diseases. *Am Rev Tuberc* 1957; 76: 1016–1030.
19. Song TJ, Lee SS, Park D, Lee TY, Lee SO, Seo DW, et al. Yield of EUS-guided FNA on the diagnosis of pancreatic / peripancreatic tuberculosis. *Gastrointes Endoscopy* 2009; 69:484–491. <https://doi.org/10.1016/j.gie.2008.10.007> PMID: 19231490
20. Seegert AB, Rudolf F, Wejse C, Neupane D. Tuberculosis and hypertension-a systematic review of the literature. *Int J Infect Dis* 2017; 56: 54–61. <https://doi.org/10.1016/j.ijid.2016.12.016> PMID: 28027993
21. WHO report on Hypertension, 16 March 2023.
22. Huaman MA, Ticona E, Miranda G, Kryscio RJ, Mugruza R, Aranda E, et al. The relationship between latent tuberculosis infection and acute myocardial infarction. *Clin Infect Dis* 2018; 66:886–92. <https://doi.org/10.1093/cid/cix910> PMID: 29069328
23. Rodríguez-Iturbe B, Pons H, Quiroz Y, Lanaspá MA, Johnson RJ. Autoimmunity in the pathogenesis of hypertension. *Nat Rev Nephrol* 2014; 10: 56–62. <https://doi.org/10.1038/nrneph.2013.248> PMID: 24247285
24. Marjani M, Baghaei P, Malekmohammad M, Tabarsi P, Sharif-Kashani B, Behzadnia N. Effect of pulmonary hypertension on outcome of pulmonary tuberculosis. *Braz J Infect Dis* 2014; 18: 487–490. <https://doi.org/10.1016/j.bjid.2014.02.006> PMID: 24780367
25. Shen TC, Huang KY, Chao CH, Wang YC, Muo CH, Wei CC. The risk of chronic kidney disease in tuberculosis: a population-based cohort study. *Q J M* 2015; 108: 397–403. <https://doi.org/10.1093/qjmed/hcu220> PMID: 25352683
26. Studer UE, Weidmann P. Pathogenesis and treatment of hypertension in renal tuberculosis. *Eur Urol* 1984; 10:164–169. <https://doi.org/10.1159/000463780> PMID: 6373300
27. Caillon A, Schiffrin EL. Role of inflammation and immunity in hypertension: recent epidemiological, laboratory, and clinical evidence. *Curr Hypertens Rep* 2016; 18: Article 21, 1–9. <https://doi.org/10.1007/s11906-016-0628-7> PMID: 26846785
28. McClatchy JK. Susceptibility testing of mycobacteria. *Lab Med* 1978; 9: 47–52.
29. Mosmann TJ. Rapid Colorimetric Assay for Cellular Growth and Survival: Application to Proliferation and Cytotoxicity Assays. *Immunol Methods* 1983; 65: 55–63.
30. Odds FC. Synergy, antagonism, and what the checkerboard puts between them. *J Antimicrob Chemother* 2003; 52:1. <https://doi.org/10.1093/jac/dkg301> PMID: 12805255
31. Aro AO, Dzoyem JP, Eloff JN, McGaw LJ. Extracts of six Rubiaceae species combined with rifampicin have good in vitro synergistic antimycobacterial activity and good anti-inflammatory and antioxidant activities. *BMC Comple Alternative Med* 2016; 16:385–392. <https://doi.org/10.1186/s12906-016-1355-y> PMID: 27716160
32. AL-Anial, Zimmermann S, Reichling J, Winka M. Pharmacological synergism of bee venom and melittin with antibiotics and plant secondary metabolites against multi-drug resistant microbial pathogens. *Phytomedicine* 2015; 22: 245–255. <https://doi.org/10.1016/j.phymed.2014.11.019> PMID: 25765829
33. Bapela NB, Lall N, Fourie PB, Franzblau SG, Van Rensburg CEJ. Activity of 7-methyljuglone in combination with anti-tuberculous drugs against *Mycobacterium tuberculosis*. *Phytomedicine* 2006; 13: 630–635. <https://doi.org/10.1016/j.phymed.2006.08.001> PMID: 16987644
34. Kumar A, Alam A, Grover S, Pandey S, Tripathi D, Kumari M, et al. Peptidyl-prolyl isomerase-B is involved in *Mycobacterium tuberculosis* biofilm formation and a generic target for drug repurposing-based intervention. *npj Biofilms Microbiome* 2019; 5:1–11.

35. Brindha S, Sundaramurthi JC, Velmurugan D, Vincent S, Gnanadoss JJ. Docking based virtual screening of known drugs against murE of Mycobacterium tuberculosis towards repurposing for TB. *Bioinformatics* 2016; 12: 368–373. <https://doi.org/10.6026/97320630012368> PMID: 28275291
36. Kewcharoenwong C, Saenwongsa W, Willcocks SJ, Bancroft GJ, Fletcher HA, Lertmemongkolchai G. Glibenclamide alters interleukin-8 and interleukin-1 $\beta$  of primary human monocytes from diabetes patients against Mycobacterium tuberculosis infection. *Tuberculosis* 2020; 123: Article101939, 1–6.
37. Kewcharoenwong C, Prabowo SA, Bancroft GJ, Fletcher HA, Lertmemongkolchai G. Glibenclamide Reduces Primary Human Monocyte Functions Against Tuberculosis Infection by Enhancing M2 Polarization. *Front Immunol* 2018; 9: Article 2109, 1–10.
38. Scheen AJ. Drug interactions of clinical importance with anti-hyperglycaemic Agents an Update. *Drug Saf* 2005; 28: 601–631
39. Ma Y, Pang Y, Shu W, Liu YH, Ge QP, Du J, et al. Metformin reduces the relapse rate of tuberculosis patients with diabetes mellitus: experiences from 3-year follow-up. *Eur J Clin Microbiol Infect Dis* 2018; 37:1259–1263. <https://doi.org/10.1007/s10096-018-3242-6> PMID: 29679254
40. Singhal A, Jie L, Kumar P, Hong GS, Leow MKS, Paleja B, et al. Metformin as adjunct antituberculosis therapy. *Sci Transl Med* 2014; 6: 263ra159. <https://doi.org/10.1126/scitranslmed.3009885> PMID: 25411472
41. Leow MK, Dalan R, Chee CBE, Earnest A, Chew DEK, Tan AWK, et al. Latent tuberculosis in patients with diabetes mellitus: prevalence, progression and public health implications. *Exp. Clin. Endocrinol. Diabetes* 2014; 122: 528–532. <https://doi.org/10.1055/s-0034-1377044> PMID: 25003362
42. Lee MC, Chiang CY, Lee CH, Ho CM, Chang CH, Wang JY, et al. Metformin use is associated with a low risk of tuberculosis among newly diagnosed diabetes mellitus patients with normal renal function: a nationwide cohort study with validated diagnostic criteria. *PLOS One* 2018; 13: e0205807. <https://doi.org/10.1371/journal.pone.0205807> PMID: 30335800
43. Pan SW, Yen YF, Kou YR, Chuang PH, Su VYF, Feng JY, et al. The risk of TB in patients with type 2 diabetes initiating metformin vs sulfonylurea treatment. *Chest* 2018; 153:1347–1357.
44. Degner NR, Wang JY, Golub JE, Karakousis JPC. Metformin use reverses the increased mortality associated with diabetes mellitus during tuberculosis treatment. *Clin Infect Dis* 2018; 66:198–205. <https://doi.org/10.1093/cid/cix819> PMID: 29325084
45. Lee YJ, Han SK, Park JH, Lee JK, Kim DK, Chung HS, et al. The effect of metformin on culture conversion in tuberculosis patients with diabetes mellitus. *Kor J Intern Med* 2018; 33: 933–940. <https://doi.org/10.3904/kjim.2017.249> PMID: 29540054
46. Lachmandas E, Beigier-Bompadre M, Cheng SC, Kumar V, Laarhoven AV, Wang X, et al. Rewiring cellular metabolism via the AKT/mTOR pathway contributes to host defence against Mycobacterium tuberculosis in human and murine cells. *Eur J Immunol* 2016; 46:2574–2586. <https://doi.org/10.1002/eji.201546259> PMID: 27624090
47. Park JY, Kim KA, Kang MH, Kim SL, Shin JG. Effect of Rifampin on the Pharmacokinetics of Rosiglitazone in Healthy Subjects. *Clin Pharmacol Ther* 2004; 75: 157–162. <https://doi.org/10.1016/j.clpt.2003.10.003> PMID: 15001966
48. Goldberg SV, Hanson D, Peloquin CA. Rifamycin Treatment of Tuberculosis in a Patient Receiving Atenolol: Less Interaction with Rifabutin than with Rifampin. *Clin Infect Dis* 2003; 37: 607–608.
49. Yoshimoto H, Takahashi M, Saima S. Influence of Rifampicin on Antihypertensive Effects of Dihydropyridine Calcium-Channel Blockers in Four Elderly Patients. *Nihon Ronen Igakkai Zasshi* 1996; 33:692–696.
50. Tada Y, Tsuda Y, Otsuka T, Nagasawa K, Kimura H, Kusaba T, et al. Case Report: Nifedipine-Rifampicin Interaction Attenuates the Effect on Blood Pressure in a Patient with Essential Hypertension. *Am J Med Sci* 1992; 303: 25–27. <https://doi.org/10.1097/0000441-199201000-00006> PMID: 1345893
51. Liu W, Yan T, Chen K, Yang L, Benet LZ, Zhai S. Predicting Interactions Between Rifampin and Antihypertensive Drugs Using the Biopharmaceutics Drug Disposition Classification System. *Pharmacotherapy* 2010; 40: 274–290.
52. Kondrack R, Mohiuddin S. Valsartan/hydrochlorothiazide: Pharmacology and Clinical Efficacy. *Expert Opinion Drug Metabol Toxicol* 2009; 5: 1125–1134. <https://doi.org/10.1517/17425250903136730> PMID: 19689218
53. Martins M, Viveiros M, Amaral L. Inhibitors of Ca<sup>2+</sup> and K<sup>+</sup> Transport Enhance Intracellular Killing of M. tuberculosis by Non-killing Macrophages. *in vivo* 2008; 22: 69–76.
54. Louw GE, Warren RM, Pittius NCGV, Leon R, Jimenez A, Hernandez-Pando R, et al. Rifampicin Reduces Susceptibility to Ofloxacin in Rifampicin resistant Mycobacterium tuberculosis through Efflux. *American J Respir Crit Care Med* 2011; 184: 269–276. <https://doi.org/10.1164/rccm.201011-1924OC> PMID: 21512166

55. Sun KC, Jung Hoon Sung JH, Cho EJ, Ahn JC, Han SH, Kim W, et al. Efficacy and safety of low-dose antihypertensive combination of amlodipine, telmisartan, and chlorthalidone: A randomized, double-blind, parallel, phase II trial. *J Clin Hypertens*. 2022; 24:1298–1309.
56. Fatima S, Bhaskar A, Dwivedi VP. Repurposing Immunomodulatory Drugs to Combat Tuberculosis. *Frontiers Immunol* 2021; 12: Article 645485.
57. Amaral L, Viveiros M. Thioridazine: A Non-Antibiotic Drug Highly Effective, in Combination with First Line Anti-Tuberculosis Drugs, against Any Form of Antibiotic Resistance of *Mycobacterium tuberculosis* Due to Its Multi-Mechanisms of Action. *Antibiotics* 2017; 6:3. <https://doi.org/10.3390/antibiotics6010003> PMID: 28098814
58. Law M R, Wald NJ, Morris JK, Jordan RE. Value of low dose combination treatment with blood pressure lowering drugs: analysis of 354 randomised trials. *BMJ* 2003; 326:1427–1434. <https://doi.org/10.1136/bmj.326.7404.1427> PMID: 12829555
